# Supplementary material
Source: PubMed Central journal article supplement (PMC5920646)
Supplement: NIHMS959091-supplement-Figures_S1_S2.pdf [file NIHMS959091-supplement-Figures_S1_S2.pdf]

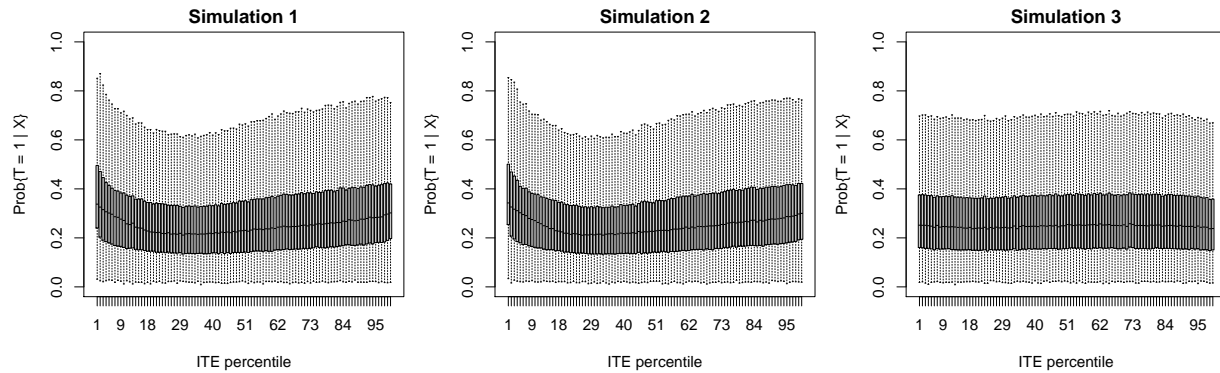

Figure S1: Assessing the overlap,  $\mathbb{P}\{T = 1 | \mathbf{X} = \mathbf{x}\}$ , for  $\mathbf{x}$  stratified by ITE percentile.

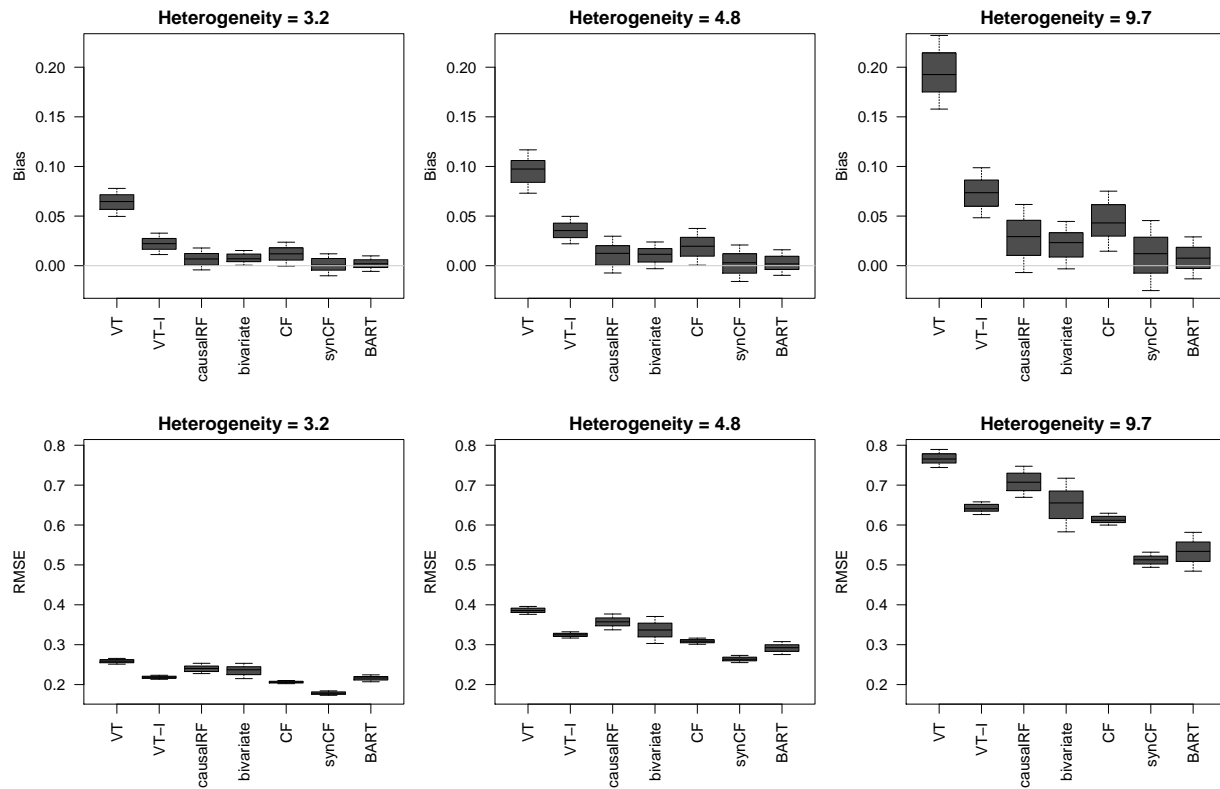

Figure S2: Assessing the effect of heterogeneity on performance: bias and RMSE results from simulation model 3 with  $n = 500$  under varying levels of treatment heterogeneity.
